# Supplementary material
Source: Springer Nature journal article supplement (https://www.springermedizin.de/resource/supplementary/12963_2009_80_MOESM4_ESM.pdf/9572604)

# Number of Deaths

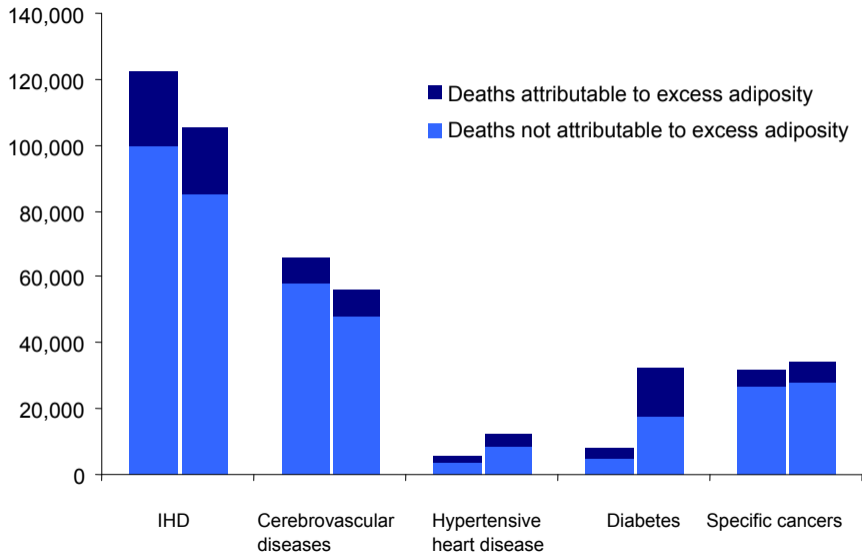

Supplement: MOESM4 [file 9572604]
